# Preprinting Microbiology

Patrick D. Schloss<sup>†</sup>

<sup>†</sup> To whom correspondence should be addressed: [pschloss@umich.edu](mailto:pschloss@umich.edu); Department of Microbiology and Immunology, University of Michigan, Ann Arbor, MI

**Format:** Perspective or Commentary

**Number of words:** ~4500 plus references, figures, and abstract

## 1 **Abstract**

2 The field of microbiology has experienced significant growth due to transformative advances in  
3 technology and the influx of scientists driven by a curiosity to understand how bacteria, archaea,  
4 microbial eukaryotes, and viruses interact with each other and their environment to sustain myriad  
5 biochemical processes that are essential for maintaining the Earth. With this explosion in scientific  
6 output, a significant bottleneck has been the ability to disseminate this new knowledge to peers  
7 and the public in a timely manner. Preprints have emerged as a tool that a growing number of  
8 microbiologists are using to overcome this bottleneck and to recruit in an effective and transparent  
9 way a broader pool of reviewers prior to submitting to traditional journals. Although use of preprints  
10 is still limited in the biological sciences, early indications are that preprints are a robust tool that can  
11 complement and enhance peer-reviewed publications. As publishing moves to embrace advances  
12 in internet technology, there are many opportunities for preprints and peer-reviewed journals to  
13 coexist in the same ecosystem.

14 **Background.** Many scientists, including microbiologists, have begun to use preprints and other  
15 online venues such as social media, blog posts, and videos as methods to garner attention for  
16 their research and to engage the public. A preprint is an interim research product, such as an  
17 unpublished manuscript, made publicly available before going through an official peer-review  
18 process (1–4). Authors can post their manuscript to a preprint server for others to read, share,  
19 and comment. Preprints were initially adopted among physicists and biologists in the 1960s as a  
20 method of sharing interesting research amongst colleagues (5). While the biological community’s  
21 commitment to preprints waned, the physics community adopted what is now the *arXiv* (pronounced  
22 “archive”) preprint server that was hosted at the Los Alamos National Laboratories from 1991 to  
23 1999 and then at Cornell University (6). For some physicists and mathematicians, posting a preprint  
24 to *arXiv* followed by submission to a peer-reviewed journal has become a standard publication  
25 pathway. Although *arXiv* has hosted a number of computational biology papers, the server has not  
26 drawn widespread attention from biologists. Among proponents of *arXiv*, preprints have aided in  
27 the development of research communication by accelerating the release of the science and helping  
28 it to achieve a wider audience for critique and reception (7). Considering the broadening adoption  
29 of preprints among microbiologists, I sought to explore the specific uses of and concerns regarding  
30 preprints.

31 **Landscape of preprint servers.** In 2013, two preprint servers, the *bioRxiv* (pronounced  
32 “bio-archive”) and *PeerJ Preprints*, were launched as preprint servers for biologists that would  
33 parallel *arXiv* (8). Both platforms offer similar features: preprint posting is free; each preprint  
34 receives a digital object identifier (DOI) that facilitates the ability to cite preprints in other scholarly  
35 work; if the preprint is ever published, the preprint is linked to the published version; the submission  
36 process for both options is relatively simple allowing authors to upload a PDF version of their  
37 preprint and supplemental materials; preprints are typically publicly available in about 24 hours;  
38 they have built in venues for authors to discuss their research with people who leave comments on  
39 the manuscript; preprints undergo a basic screening process to remove submissions with offensive  
40 or non-scientific content; and the sites provide article-level metrics indicating the number of times  
41 an abstract has been accessed or the preprint has been downloaded. There are several important  
42 differences between the two options. First, *PeerJ Prints* is a for-profit organization and *bioRxiv*

43 is a non-profit organization sponsored by Cold Spring Harbor Laboratory. This difference can  
44 be meaningful to authors since some journals, including the American Society for Microbiology  
45 (ASM) Journals, will only accept submissions that have been posted on preprint servers hosted  
46 by non-profit organizations. Second, preprints at *PeerJ Preprints* are posted under the Creative  
47 Commons Attribution License (CC-BY) and *bioRxiv* preprints can be posted under one of four  
48 CC-BY licenses or with no permission for reuse. This can be relevant for authors hoping to submit  
49 their work to a journal as journals will not consider manuscripts posted as preprints under a CC-BY  
50 license (e.g. *Proceedings of the National Academy of Sciences*). The flexibility of the *bioRxiv*  
51 licensing empowers authors to choose the model that best suits them, while ensuring the rapid  
52 posting of their research results however, it is important to provide clear information to authors on  
53 the legal and practical tradeoffs of each option. A cosmetic, but still relevant difference between the  
54 two is the layout and feel of the two websites. Compared to the *bioRxiv* site, the *PeerJ Preprint* site  
55 is more fluid, gives readers the ability to “follow” a preprint, and provides better access to article  
56 keywords and the ability to search preprints. With broader acceptance of preprints by traditional  
57 journals, many journals, including all of the ASM journals, have established mechanisms to directly  
58 submit manuscripts that are posted as preprints on *bioRxiv*. It is only possible to transfer a *PeerJ*  
59 *Preprint* for submission to *PeerJ*. In many ways, preprint servers have taken on the feel of a journal.  
60 As adoption of this approach expands, it is likely that the features of these sites will continue to  
61 improve. It is also likely that interfaces from third-parties will improve. For example, although  
62 Google Scholar includes preprints hosted at *bioRxiv* and *PeerJ Preprints* in their search results,  
63 PubMed and Web of Science do not. There is also hope that the National Institutes of Health (NIH)  
64 will renew their interest in indexing preprints as separate research products than peer-reviewed  
65 publications. As preprint servers begin to look and act like traditional journals by incorporating  
66 features and interfaces, it is important to value the strength of the preprint - that of an interim  
67 research product, nimble and quickly posted. It is therefore essential to balance the requirements  
68 placed on authors for features associated with preprints with the current desirable efficiency of the  
69 preprint format.

70 ***Specific challenges for microbiology.*** Although preprints offer an efficient and novel venue for  
71 disseminating microbiology research, there are several considerations that the scientific community

72 and those that oversee preprint servers must consider. It is critical that assurances be given that  
73 policies are in place to address these issues. First, a significant amount of attention has to be  
74 given to the potential dual use research of concern (DURC) since posted results in microbiology  
75 research could offer insights to individuals seeking to engage in terrorist activities. Second, for  
76 researchers engaging in research that involves human subjects it is critical that assurances be  
77 made that institutional review boards have been consulted and have approved of the research.  
78 Third, there is significant concern regarding researchers hiding potential conflicts of interest that  
79 could affect a project's experimental design, analysis, and interpretation of results. Finally, recent  
80 expansions in scientific publishing have revealed numerous cases of plagiarism or misconduct.  
81 Again, while hoping to maintain the efficiency of the preprint format, traditional microbiology journals  
82 have policies for these issues in place that should be easy to implement by preprint servers.

83 **Acceptance of preprints by journals.** An early controversy encountered by researchers  
84 interested in posting their work as preprints as a stage in disseminating their research was whether  
85 it constituted prior publication (9). The broad consensus of the International Committee of Medical  
86 Journal Editors and numerous journals is that preprints do not constitute prior publication (10).  
87 This consensus is reflected in the current policies of journals that commonly publish microbiology  
88 research including those published by ASM, the Microbiology Society, International Society for  
89 Microbial Ecology, PLOS, the *Proceedings of the National Academy of Science*, *Science*, *Nature*,  
90 *Journal of Infectious Diseases*, and Cell press, which each take a generally permissive stance  
91 towards prior posting of preprints prior to submission. Considering the relatively fluid nature of  
92 many of these policies and the journals' specific policies, prospective authors should be aware of  
93 the positions taken by the journals where they may eventually submit their work. Comprehensive  
94 lists of journals' attitudes towards preprints are available online and are regularly updated (11, 12).

95 **Preprints and peer-review.** The use of preprints for citations in other scientific reports and grant  
96 proposals has been called into question because preprints upend the traditional peer-review editorial  
97 process (13). It is important to note that the peer-review process was adapted to the technologies  
98 and trends that have evolved over the past 100 years. The formal peer-review system that most  
99 journals currently use was not developed until the end of the 1800s with the advent of typewriters  
100 and carbon paper (14). Editorial decisions were typically made by a single person or a committee

101 (i.e. the editorial board) who had an expertise that covered the scope of the journal. As science  
102 became more specialized, new journals would form to support and provide a source of validation to  
103 the new specialty. The growth in science in the mid 1900s resulted in a shift from journals struggling  
104 to find sufficient numbers of manuscript to publish to having too many manuscripts submitted. It has  
105 been argued that the widespread adoption of decentralized peer-review was due to the increased  
106 specialization and to deal with the large number of manuscript submissions (15). Peer-review did  
107 not achieve widespread use at many journals, including the *Journal of Bacteriology*, until the 1940s  
108 and 1950s. Thus the “tradition” of peer-review is only 70 years old. Given the rapid advances in  
109 communication technology and even greater specialization within microbiology, it is worth pondering  
110 whether the current scientific publishing system and peer-review system, in particular, need to  
111 continue to adapt with our science.

112 Communicating research has traditionally been done within research group meetings, departmental  
113 seminars, conferences, and as publications. Along this continuum, there is an assumption that  
114 the quality of the science has been improved because it has been vetted by more experts in the  
115 field. The public dissemination of one’s research is a critical component of the scientific method. By  
116 describing their research, scientists subject their work to formal and informal peer review. Their  
117 research is scrutinized, praised, and probed to identify questions that help seed the next iteration  
118 of the scientific method. A common critique of more modern approaches to publishing has been  
119 an inability to assess the quality of the science without the validation of peer-review. Attached  
120 to assertions of the validity of the research has been assertions of the impact and robustness of  
121 the research. These are all quality assessments that many acknowledge are difficult to assess  
122 by the traditional peer-review process. This has led to some journals, most notably *PLOS ONE*,  
123 calling for referees to place a reduced emphasis on the perceived impact or significance of the  
124 work. It has also led to the call for replacing or complementing pre-publication peer-review with  
125 post-publication peer-review using PubMed Commons, PubPeer, journal-based discussion forums,  
126 F1000Research, and other mechanisms. Alas if scientists are going to depend on post-publication  
127 peer-review or informal methods of peer-review for documents like preprints, they must be willing to  
128 provide constructive feedback on the work of others.

129 ***Preprints have the potential to change the advancement of science.*** Preprints are often

130 viewed as existing in a state of scientific limbo. As noted above, they represent a formal  
131 communication, but an interim one, not officially published. As the use of preprints grows and  
132 scientists' perceptions of preprints matures, there are a number of issues that will need to be  
133 addressed.

134 First, a common concern is that if a researcher posts their work as a preprint, it will be “scooped”  
135 by another researcher and the preprint author will lose their ability to claim primacy or their ability to  
136 publish the work in a journal. Considering the preprint is a citable work with a DOI, it would, in fact,  
137 be the preprint author that scooped the second. The use of preprints uncouples the communication  
138 of the discovery from the relevance of the discovery, which will come later based on peer-review,  
139 comments from other scientists at meetings or online, and eventually citations. A growing number of  
140 scientific societies and journals, including ASM view preprints as citable and as having a legitimate  
141 claim to primacy (1, 16–18). Some scientists worry that with such protection a researcher can  
142 make a claim without valid data to support their claims (3). This is possible; however, it is also the  
143 responsibility of the scientific community to utilize the peer-review mechanisms that are available  
144 to comment on those preprints pointing out methodological problems or to indicate that they are  
145 speaking beyond the data.

146 A second area of concern is whether a preprint can be used to support a grant proposal. Given the  
147 length limitations placed on grant proposals by funding agencies, there is a push to cite previous  
148 work to indicate a research team's competence in an area or to provide preliminary data. Some  
149 fear that the use of preprints will allow scientists to circumvent page limits by posting preliminary  
150 manuscripts. I would hope that both consumers of preprints and grant proposal reviewers would  
151 be able to differentiate between someone trying to game the system and someone that is using  
152 preprints as a mechanism to improve their science. This would be greatly facilitated if funding  
153 agencies would include preprints as evidence for research progress, but listed separately from  
154 peer-reviewed publications to help review panels in their decisions and to help author substantiate  
155 evidence they feel they need to provide.

156 A third concern is what role preprints should have in assessing a scientist's productivity. Clearly use  
157 of publication metrics as an indicator of a scientist's productivity and impact is a contentious topic

158 without even discussing the role of preprints. Regardless, given the propensity for researchers to list  
159 manuscripts as being “in preparation” or “in review” on an application or curriculum vitae, listing them  
160 instead as preprints that can be reviewed by a committee would significantly enhance an application  
161 and a reviewer’s ability to judge the application. In fact, several funding agencies including the  
162 Wellcome Trust and the UK Medical Research Council encouraging fellowship applicants to include  
163 preprints in their materials; meanwhile, the NIH is in the process of soliciting input from the scientific  
164 community on their role in grant applications. Others are mandating that researchers post preprints  
165 for all of their work prior to submitting the work to a journal (19).

166 Beyond these concerns, preprints are also causing some to change their publication goals. Some  
167 authors are explicitly stating that a preprint will not be submitted to a journal (20). Although these  
168 authors may be a minority of those who post preprints, such an approach may be attractive to those  
169 who need to cite a report of a brief research communication, a critique of another publication, or  
170 negative results. It is clear that the adoption of preprints will challenge how scientists interact and  
171 evaluate each other’s work. There is great potential to empower researchers by controlling when a  
172 citable piece of work is made public.

173 ***Microbiology anecdotes.*** The peer-review editorial process can be lengthy and adversarial. In  
174 contrast, preprints represent a rapid and potentially collaborative method for disseminating research.  
175 Several anecdotes from the microbiology literature are emblematic of benefits of the rapid release  
176 cycle that is inherent in the use of preprints.

177 First, preprints have proven useful for rapidly disseminating results for disease outbreaks and new  
178 technologies. Prior to the recent Zika virus outbreak there were approximately 50 publications  
179 that touched on the biology and epidemiology of the virus; as of January 2017 the number of  
180 Zika virus-related publications was over 1,700. During the recent outbreak, more than 110 Zika  
181 virus-related preprints have been posted at *bioRxiv*. Any manuscript that was published went  
182 through several month delays in releasing information to health care workers, the public, and  
183 scientists needing to learn new methods to study a previously obscure virus. In contrast, those that  
184 posted their work as a preprint were able to disseminate their methods and results instantly. Over  
185 the last several years there have also been rapid advances in DNA sequencing technologies have



186 fundamentally changed how microbial science is performed. One notable technology, the Minlon  
187 sequencing platform from Oxford Nanopore, has received considerable attention from researchers  
188 who have posted more than 90 preprints describing new Minlon-based methods and results to  
189 preprint servers. For such a rapidly developing technology, the ability to share and consume  
190 methods from other scientists has created a feed forward effect where the technology has likely  
191 advanced at a faster rate than it otherwise would have.

192 Second, preprints have proven useful for rapidly correcting the scientific literature. On February  
193 9, 2015, *Cell Systems* posted a study by Afshinnkoo et al. online (21). The study collected and  
194 analyzed metagenomic sequence data from the New York City subway system and reported finding  
195 *Yersinia pestis* and *Bacillus anthracis*. Because of the focus on these two bioterrorism agents,  
196 this study generated a considerable amount of media attention. On April 25, 2015, Petit et al.  
197 (22) posted a preprint to Zenodo demonstrating that there was no evidence for *B. anthracis* in  
198 the dataset. On July 29, 2015, a critique was published by *Cell Systems* along with a response  
199 from the original authors offering a correction to their manuscript (23, 24). A second anecdote of  
200 using preprints to aid in post-publication peer-review surrounds the publishing of a draft tardigrade  
201 genome in *The Proceedings of the National Academy of Sciences*. On November 23, 2015 a study  
202 by Boothby et al. (25) was first published online. The authors claimed that 17.5% of its genes came  
203 from bacteria, archaea, fungi, plants, and viruses. Another group had been analyzing sequence  
204 data from a parallel tardigrade genome sequencing project and did not observe the same result.  
205 A week later, on December 1, 2015, the second group had posted a preprint comparing the two  
206 genome sequences and demonstrating that the exciting claims of horizontal gene transfer were  
207 really the product of contaminants (26); this analysis would eventually be published online by the  
208 original journal on March 24, 2016 followed by a rebuttal by the original authors on May 31, 2016  
209 (27, 28). Two other analyses of the original data were published in May 2016 and a third was posted  
210 as a preprint on February 2, 2016 (29–31). These anecdotes underscore the value of having a  
211 rapid posting cycle to correcting errors in the scientific literature and that results posted to preprint  
212 servers were able to correct the record within weeks of the initial publication while the traditional  
213 path took six months in both cases. A final notable case where preprints have accelerated the  
214 correction of the scientific record was a preprint posted by Bik et al. reporting numerous cases of

215 image manipulation in peer reviewed studies (32). Their preprint was posted on April 20, 2016 and  
216 published in *mBio* on June 7, 2016 (33). Instead of using preprints to react to published papers  
217 that have been through peer review, it would be interesting to consider how the editorial process  
218 for these examples and the infamous “Arsenic Life” paper (34) would have been different had they  
219 initially been posted as preprints.

220 ***Metrics for microbiology-affiliated preprints.*** To analyze the use of preprints, I downloaded the  
221 *bioRxiv* on December 31, 2016. I chose to analyze *bioRxiv* preprints because these preprints are  
222 amenable for submission to ASM journals and there were 7,434 *bioRxiv* preprints compared to the  
223 2,650 available at *PeerJ Preprint*. Among the 7,434 preprints on *bioRxiv*, 329 were assigned by  
224 the authors into the Microbiology category. One limitation of the *bioRxiv* interface is the inability  
225 to assign manuscripts to multiple categories or to tag the content of the preprint. For example,  
226 this manuscript could be assigned to either the Microbiology or the Scientific Communication and  
227 Education categories. To counter this limitation, I developed a more permissive approach that  
228 classified preprints as being microbiology-affiliated if their title or abstract had words containing  
229 *yeast, fung, viral, virus, archaea, bacteri, microb, microorganism, or pathogen*. I identified 1,228  
230 additional manuscripts that I considered microbiology-affiliated. These microbiology-affiliated  
231 preprints were primarily assigned to the Evolutionary Biology (N=221), Genomics (N=184), or  
232 Bioinformatics (N=182) categories.

233 As the total number of preprints has grown exponentially since the creation of *bioRxiv*, submission  
234 of microbiology-affiliated preprints has largely followed this growth (**Figure 1A**). Although preprints  
235 are still relatively new, the collection of microbiology-affiliated preprints indicates widespread  
236 experimentation with the format and considerable geographic diversity. Reflecting the still relatively  
237 novelty of preprints, 1,132 (86.1%) corresponding authors who submitted a microbiology-affiliated  
238 preprint (N=1,314 total) have posted a single preprint and 3.6% have posted 3 or more preprints.  
239 Corresponding authors that have posted microbiology-affiliated preprints are from 60 countries  
240 and are primarily affiliated with institutions in the United States (50.8% of microbiology-affiliated  
241 preprints), United Kingdom (11.9%), and Germany (4.2%). As the preprint format matures, it will be  
242 interesting to see whether the fraction of authors that post multiple preprints increases and whether  
243 the geographic diversity amongst those authors is maintained.

244 As stated above, preprints offer researchers the opportunity to improve the quality of their work by  
245 adding a more formal and public step to the scientific process. Among the microbiology-affiliated  
246 preprints, 146 (9.3%) had been commented on at least once and only 35 (2.2%) more than  
247 three times using the *bioRxiv*-hosted commenting feature. Although the hosted commenting  
248 is only one mechanism for peer review, this result was somewhat disturbing since the preprint  
249 model implicitly depends on people's willingness to offer others feedback. Although it is not in  
250 the tradition of the scientific community to comment publicly online about colleagues' research  
251 results, I am optimistic that this will change given the possibilities of new media, and possibly  
252 incentives for open commenting and reviewing could shift the trend. Importantly, authors do appear  
253 to be incorporating feedback from colleagues or editorial insights from journals as 404 (25.8%) of  
254 preprints were revised at least once. Among the preprints posted prior to January 1, 2016, 31.6%  
255 of the Microbiology category preprints, 35.1% of the microbiology-affiliated preprints, and 33.8% of  
256 all preprints have been published. As noted above, not all authors submit their preprints to journals.  
257 This would indicate that the "acceptance rates" are actually higher. Regardless, considering that  
258 these acceptance rates are higher than many peer-reviewed journals (e.g. approximately 20% at  
259 ASM Journals), these results dispel the critique that preprints represent overly preliminary research.

260 Measuring the impact and significance of scientific research is notoriously difficult. Using several  
261 metrics I sought to quantify the effect that broadly defined microbiology-affiliated preprints have  
262 had on the work of others. Using the download statistics associated with each preprint, I found  
263 that the median number of times an abstract or PDF had been accessed was 923 (IQR: 603 to  
264 1445) and 303 (IQR: 167 to 568), respectively. These values represent two aspects of posting  
265 a preprint. First, they reflect the number of times people were able to access science before it  
266 was published. Second, they reflect the number of times people were able to access a version  
267 of a manuscript that is published behind a paywall. To obtain a measure of a preprint's ability to  
268 garner attention and engage the public, I obtained the Altmetric Attention Score for each preprint  
269 (**Figure 1B**). The Altmetric Attention Score measures the number of times a preprint or paper is  
270 mentioned in social media, traditional media, Wikipedia, policy documents, and other sources (35).  
271 A higher score indicates that a preprint received more attention. Microbiology-affiliated preprints  
272 have had a median Altmetric Attention Score of 7.3 (IQR: 3.2 to 16.3) and those of all preprints

273 hosted at *bioRxiv* have had a median score of 7.0 (IQR: 3 to 15.6). For comparison, the median  
274 Altmetric Attention Score for articles published in *mBio* published since 2013 was 4.5 (IQR: 1.2 to  
275 13.6). Of all scholarship tracked by Altmetric, the median Altmetric Attention Score for preprints  
276 posted at *bioRxiv* ranks at the 86 percentile (IQR: 66 to 94. A more traditional and controversial  
277 metric of impact has been the number of citations an article receives. I obtained the number of  
278 citations for the published versions of manuscripts that were initially posted as preprints. To allow  
279 for a comparison to traditional journals, I considered the citations for preprints published in 2014  
280 and 2015 as aggregated by Web of Science (**Figure 1C**). Among the preprints that were published  
281 and could be found in the Web of Science database, the median number of citations was 6.5 (IQR:  
282 2-14; mean: 13.6). For comparison, for the papers published in *mBio* in 2014 and 2015, the median  
283 number of citations was 5 (IQR: 2-9; mean: 6.7). Although it is impossible to quantify the quality or  
284 impact of research with individual metrics, it is clear that preprints and the publications that result  
285 from them are broadly accepted by the microbiology community.

286 ***Preprints from an author's perspective.*** Posting research as a preprint gives an author great  
287 control over when their work is made public. Under the traditional peer-review model, an author  
288 may need to submit and revise their work multiple times to several journals over a long period  
289 before it is finally published. In contrast, an author can post the preprint at the start of the process  
290 for others to consume and comment on as it works its way through the editorial process. A first  
291 example illustrates the utility of preprints for improving access to research and the quality of its  
292 reporting. In 2014, my research group posted a preprint to *PeerJ Preprints* describing a method of  
293 sequencing 16S rRNA gene sequences using the Pacific Biosciences sequencing platform (36).  
294 At the same time, they submitted the manuscript for review at *PeerJ*. While the manuscript was  
295 under review, they received feedback from an academic scientist and from scientists at Pacific  
296 Biosciences that the impact of the results could be enhanced by using a recently released version  
297 of the sequencing chemistry. Instead of ignoring this feedback and resubmitting the manuscript to  
298 address the reviews, we generated new data and submitted an updated preprint a year later with a  
299 simultaneous submission to *PeerJ* that incorporated the original reviews as well as the feedback we  
300 received from the academic scientist and Pacific Biosciences. It was eventually published by *PeerJ*  
301 (37, 38). Since 2015, we have continued to post manuscripts as preprints at the same time as we

302 have submitted manuscripts. Although the feedback to other manuscripts has not been as helpful  
303 as our initial experience, we were able to sidestep lengthy review processes by immediately making  
304 our results available; in one case our preprint was available 7 months ahead of the final published  
305 version (39, 40). As a second example, this manuscript was posted to *bioRxiv* as a preprint on  
306 **February 22, 2017**. I then solicited feedback on the manuscript using social media. Two weeks  
307 later, I incorporated the comments and posted a revised preprint and submitted the manuscript  
308 to *mBio*. During that time, the abstract was read **XXXX** times and the PDF was accessed **XXXX**  
309 times. This process engaged **XXXX** commenters on *bioRxiv*, **XXXX** people on Twitter, **XXXX** on  
310 Facebook, and **XXXX** via email. I received useful feedback from **XXX** people. Compared to the two  
311 or three scientists that typically review a manuscript, this experience engaged a much larger and  
312 more diverse community than had I foregone the posting of a preprint. Although there are concerns  
313 regarding the quality of the science posted to a preprint server, I contend that responsible use of  
314 preprints as a part of the scientific process can significantly enhance the science.

315 ***Preprints from a publisher's perspective.*** A lingering question is what role traditional journals  
316 will have in disseminating research if there is broad adoption of preprints. Edited peer-reviewed  
317 journals offer and will continue to offer significant added value to a publication. A scholarly  
318 publishing ecosystem in which preprints coexist with journals will allow authors to gain value from  
319 the immediate communication of their work associated with preprints and also benefit from the  
320 peer-reviewed, professionally edited publication that publishers can provide. The professional  
321 copyediting, layout, and publicity that these publishers offer are also unique features of traditional  
322 journals. An alternative perspective is that preprints will eventually replace traditional journals.  
323 Certainly, this is a radical perspective, but it does serve to motivate publishers to capture the  
324 innovation opportunities offered by preprints. By adopting preprint-friendly policies, journals can  
325 create an attractive environment for authors. As discussed above, a growing number of journals  
326 have created mechanisms for authors to directly submit preprints to their journals. An example is  
327 offered by the ASM, which earlier this year launched a new venture from *mSphere*. *mSphereDirect*  
328 is a publication track of the journal that capitalizes on the opportunity offered to couple preprints  
329 with rigorous peer-review. *mSphereDirect*. actively encourages authors to post their manuscripts  
330 as preprints as part of an author-driven editorial process where an editorial decision is rendered

331 within five days and publication in *mSphere* within a month (41). ASM is developing a new  
332 platform, MicroNow, which will help coalesce specific communities within the microbial sciences,  
333 further enhancing the use of preprints as well as published articles (Stefano Bertuzzi, personal  
334 communication). In addition to integrating preprints into the traditional editorial process, several  
335 professional societies have also explicitly supported citation of preprints in their other publications  
336 and recognize the priority of preprints in the literature (16–18). These are policies that empower  
337 authors and make specific journals more attractive. Other practices have great potential to improve  
338 the reputation of journals. As measured above, preprints are able to garner attention on par with  
339 papers published in highly selective microbiology journals. Thus, it is in a journal's best interest to  
340 recruit these preprints to their journals. Several journals including *PLOS Genetics* and *Genome*  
341 *Biology* have publicly stated that they scout preprints for this purpose (42, 43). Preprints can also  
342 be viewed as a lost opportunity to journals. A preprint that garners significant attention may be  
343 ignored when it is finally published, bringing little additional attention to the journal. Going forward, it  
344 will be interesting to see the innovative approaches that publishers develop so that they can benefit  
345 by incorporating preprints into their process and whether publishers' influence is reduced by the  
346 widespread adoption of preprints.

347 **Conclusions.** An increasing number of microbiologists are posting their unpublished work to  
348 preprint servers as an efficient method for disseminating their research prior to peer review. A  
349 number of critical concerns remain about how widespread their adoption will be, how they will be  
350 perceived by traditional journals and other scientists, and whether traditional peer-review will adapt  
351 to the new scientific trends and technologies. Regardless, preprints should offer a great opportunity  
352 for both scientists and journals to publish high quality science.

## 353 **Acknowledgements**

354 I am grateful to Stefano Bertuzzi and Lynn Enquist for their helpful comments on earlier versions of  
355 this manuscript. This work was supported in part by funding to PDS from the National Institutes  
356 of Health (P30DK034933). I appreciate the support of Altmetric, Inc and Thompson Reuters who  
357 provided advanced programming interface (API) access to their databases. The workflow utilized

358 commands in GNU make (v.3.81), GNU bash (v.4.1.2), and R (v.3.3.2). Within R I utilized the cowplot  
359 (v.0.6.9990), dplyr (v.0.5.0), ggplot2 (v.2.1.0.9001), httr (v.1.2.1), RCurl (v.1.95-4.8), rentrez (v.1.0.4),  
360 rjson (v.0.2.15), rvest (v.0.3.2), sportcolors (v.0.0.1), and tidyr (v.0.6.0) packages. A reproducible  
361 version of this manuscript and analysis is available at [http://www.github.com/SchlossLab/Schloss\\_](http://www.github.com/SchlossLab/Schloss_)  
362 [PrePrints\\_mBio\\_2017](http://www.github.com/SchlossLab/Schloss_PrePrints_mBio_2017).

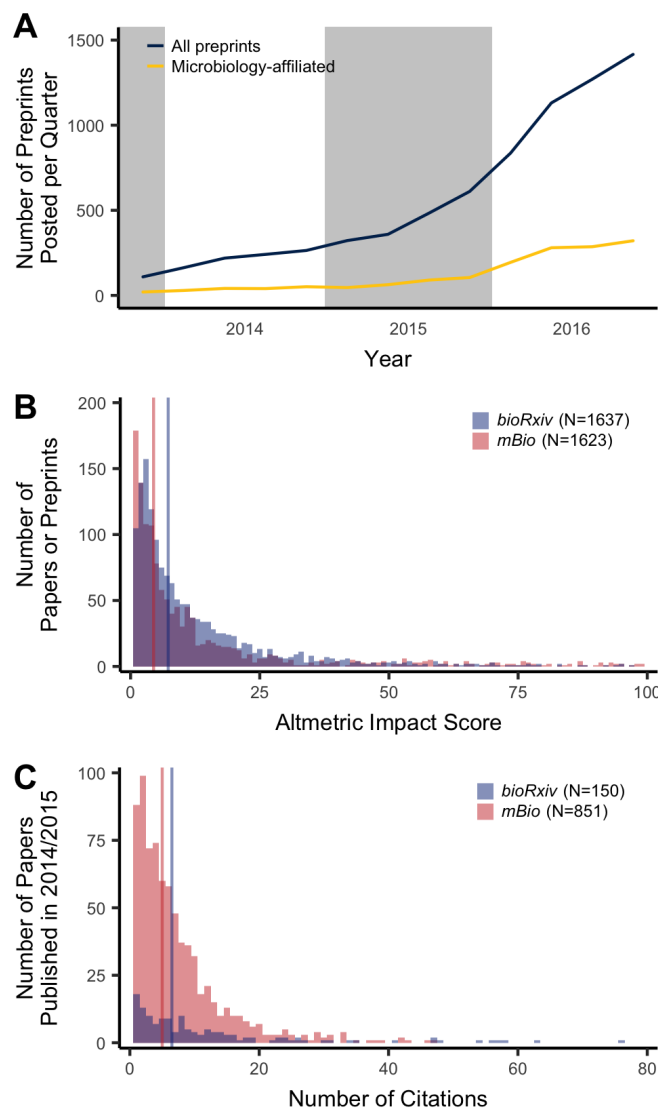

363

364 **Figure 1. Summary of microbiology-affiliated preprints since the creation of *bioRxiv*.** The  
365 total number of preprints posted for each quarter ending December 31, 2016 has largely tracked the  
366 overall submission of preprints to *bioRxiv* (A). The Altmetric attention scores of preprints posted to  
367 *bioRxiv* are similar to those published in *mBio* since November 2013 indicating preprints engender  
368 a similar level of attention (B). The number of times preprints that were published in 2014 and 2015  
369 have been cited is similar to the number of citations for papers published in *mBio* in 2014 and  
370 2015 indicates that published preprints are frequently cited (C). Regions with common background  
371 shading in A are from the same year. The vertical lines in B and C indicate the median Altmetric  
372 impact score and the median number of citations.



## 373 References

- 374 1. **Vale RD**. 2015. Accelerating scientific publication in biology. *Proceedings of the National*  
375 *Academy of Sciences* **112**:13439–13446. doi:<http://doi.org/10.1073/pnas.1511912112>.
- 376 2. **Desjardins-Proulx P, White EP, Adamson JJ, Ram K, Poisot T, Gravel D**. 2013. The case  
377 for open preprints in biology. *PLoS Biology* **11**:e1001563. doi:[http://doi.org/10.1371/journal.pbio.](http://doi.org/10.1371/journal.pbio.1001563)  
378 [1001563](http://doi.org/10.1371/journal.pbio.1001563).
- 379 3. **Berg JM, Bhalla N, Bourne PE, Chalfie M, Drubin DG, Fraser JS, Greider CW, Hendricks**  
380 **M, Jones C, Kiley R, King S, Kirschner MW, Krumholz HM, Lehmann R, Leptin M, Pulverer**  
381 **B, Rosenzweig B, Spiro JE, Stebbins M, Strasser C, Swaminathan S, Turner P, Vale RD,**  
382 **VijayRaghavan K, Wolberger C**. 2016. Preprints for the life sciences. *Science* **352**:899–901.  
383 doi:<http://doi.org/10.1126/science.aaf9133>.
- 384 4. **Bhalla N**. 2016. Has the time come for preprints in biology? *Molecular Biology of the Cell*  
385 **27**:1185–1187. doi:<http://doi.org/10.1091/mbc.e16-02-0123>.
- 386 5. 1966. Preprints galore. *Nature* **211**:897–898. doi:<http://doi.org/10.1038/211897a0>.
- 387 6. **Ginsparg P**. 2011. ArXiv at 20. *Nature* **476**:145–147. doi:<http://doi.org/10.1038/476145a>.
- 388 7. **Shuai X, Pepe A, Bollen J**. 2012. How the scientific community reacts to newly submitted  
389 preprints: Article downloads, twitter mentions, and citations. *PLoS ONE* **7**:e47523. doi:[http://](http://doi.org/10.1371/journal.pone.0047523)  
390 [doi.org/10.1371/journal.pone.0047523](http://doi.org/10.1371/journal.pone.0047523).
- 391 8. **Callaway E**. 2013. Biomedical journal and publisher hope to bring preprints to life. *Nature*  
392 *Medicine* **19**:512–512. doi:<http://doi.org/10.1038/nm0513-512>.
- 393 9. **Angell M, Kassirer JP**. 1991. The ingelfinger rule revisited. *New England Journal of Medicine*  
394 **325**:1371–1373. doi:<http://doi.org/10.1056/nejm199111073251910>.
- 395 10. Recommendations for the conduct, reporting, editing, and publication of scholarly work in  
396 medical journals. [http://www.icmje.org/news-and-editorials/icmje-recommendations\\_annotated\\_](http://www.icmje.org/news-and-editorials/icmje-recommendations_annotated_)

397 [dec16.pdf](#).

398 11. List of academic journals by preprint policy. [https://en.wikipedia.org/wiki/List\\_of\\_academic\\_](https://en.wikipedia.org/wiki/List_of_academic_journals_by_preprint_policy)  
399 [journals\\_by\\_preprint\\_policy](#).

400 12. Publisher copyright policies & self-archiving. <http://www.sherpa.ac.uk/romeo/index.php>.

401 13. **Drubin DG**. 2016. The mismeasure of scientific research articles and why MBoC quickly  
402 embraced preprints. *Molecular Biology of the Cell* **27**:3181–3182. doi:[http://doi.org/10.1091/mbc.](http://doi.org/10.1091/mbc.e16-09-0651)  
403 [e16-09-0651](#).

404 14. **Spier R**. 2002. The history of the peer-review process. *Trends in Biotechnology* **20**:357–358.  
405 doi:[http://doi.org/10.1016/s0167-7799\(02\)01985-6](http://doi.org/10.1016/s0167-7799(02)01985-6).

406 15. **Burnham JC**. 1990. The evolution of editorial peer review. *JAMA: The Journal of the American*  
407 *Medical Association* **263**:1323. doi:<http://doi.org/10.1001/jama.1990.03440100023003>.

408 16. **Pulverer B**. 2016. Preparing for preprints. *The EMBO Journal* **35**:2617–2619. doi:<http://doi.org/10.15252/embj.201670030>.

410 17. **Loew LM**. 2016. Peer review and bioRxiv. *Biophysical Journal* **111**:E01–E02. doi:<http://doi.org/10.1016/j.bpj.2016.06.035>.

412 18. **Vale RD, Hyman AA**. 2016. Priority of discovery in the life sciences. *eLife* **5**. doi:<http://doi.org/10.7554/elife.16931>.

414 19. **Dolgin E**. 2016. Big biology projects warm up to preprints. *Nature*. doi:[http://doi.org/10.1038/](http://doi.org/10.1038/nature.2016.21074)  
415 [nature.2016.21074](#).

416 20. **Chawla DS**. 2017. When a preprint becomes the final paper. *Nature*. doi:[http://doi.org/10.](http://doi.org/10.1038/nature.2017.21333)  
417 [1038/nature.2017.21333](#).

418 21. **Afshinnekoo E, Meydan C, Chowdhury S, Jaroudi D, Boyer C, Bernstein N, Maritz JM,**  
419 **Reeves D, Gandara J, Chhangawala S, Ahsanuddin S, Simmons A, Nessel T, Sundaresh**  
420 **B, Pereira E, Jorgensen E, Kolokotronis S-O, Kirchberger N, Garcia I, Gandara D, Dhanraj**

- 421 **S, Nawrin T, Saletore Y, Alexander N, Vijay P, Hénaff EM, Zumbo P, Walsh M, O'Mullan**  
422 **GD, Tighe S, Dudley JT, Dunaif A, Ennis S, O'Halloran E, Magalhaes TR, Boone B, Jones**  
423 **AL, Muth TR, Paolantonio KS, Alter E, Schadt EE, Garbarino J, Prill RJ, Carlton JM, Levy**  
424 **S, Mason CE.** 2015. Geospatial resolution of human and bacterial diversity with city-scale  
425 metagenomics. *Cell Systems* 1:72–87. doi:<http://doi.org/10.1016/j.cels.2015.01.001>.
- 426 22. **Petit III RA, Ezewudo M, Joseph SJ, Read TD.** 2015. Searching for anthrax in the New York  
427 City subway metagenome. doi:<http://doi.org/10.5281/zenodo.17158>.
- 428 23. **Ackelsberg J, Rakeman J, Hughes S, Petersen J, Mead P, Schriefer M, Kingry L,**  
429 **Hoffmaster A, Gee JE.** 2015. Lack of evidence for plague or anthrax on the new york city subway.  
430 *Cell Systems* 1:4–5. doi:<http://doi.org/10.1016/j.cels.2015.07.008>.
- 431 24. **Afshinnekoo E, Meydan C, Chowdhury S, Jaroudi D, Boyer C, Bernstein N, Maritz JM,**  
432 **Reeves D, Gandara J, Chhangawala S, Ahsanuddin S, Simmons A, Nessel T, Sundaresh B,**  
433 **Pereira E, Jorgensen E, Kolokotronis S-O, Kirchberger N, Garcia I, Gandara D, Dhanraj S,**  
434 **Nawrin T, Saletore Y, Alexander N, Vijay P, Hénaff EM, Zumbo P, Walsh M, O'Mullan GD,**  
435 **Tighe S, Dudley JT, Dunaif A, Ennis S, O'Halloran E, Magalhaes TR, Boone B, Jones AL,**  
436 **Muth TR, Paolantonio KS, Alter E, Schadt EE, Garbarino J, Prill RJ, Carlton JM, Levy S,**  
437 **Mason CE.** 2015. Modern methods for delineating metagenomic complexity. *Cell Systems* 1:6–7.  
438 doi:<http://doi.org/10.1016/j.cels.2015.07.007>.
- 439 25. **Boothby TC, Tenlen JR, Smith FW, Wang JR, Patanella KA, Nishimura EO, Tintori SC, Li**  
440 **Q, Jones CD, Yandell M, Messina DN, Glasscock J, Goldstein B.** 2015. Evidence for extensive  
441 horizontal gene transfer from the draft genome of a tardigrade. *Proceedings of the National*  
442 *Academy of Sciences* 112:15976–15981. doi:<http://doi.org/10.1073/pnas.1510461112>.
- 443 26. **Koutsovoulos G, Kumar S, Laetsch DR, Stevens L, Daub J, Conlon C, Maroon H, Thomas**  
444 **F, Aboobaker A, Blaxter M.** 2016. No evidence for extensive horizontal gene transfer in the  
445 genome of the tardigrade *hypsibius dujardini*. bioRxiv 033464. doi:<http://doi.org/10.1101/033464>.
- 446 27. **Boothby TC, Goldstein B.** 2016. Reply to bemm et al. and arakawa: Identifying foreign genes  
447 in independent *Hypsibius dujardini* genome assemblies. *Proceedings of the National Academy of*

- 448 Sciences **113**:E3058–E3061. doi:<http://doi.org/10.1073/pnas.1601149113>.
- 449 28. **Koutsovoulos G, Kumar S, Laetsch DR, Stevens L, Daub J, Conlon C, Maroon H, Thomas**  
450 **F, Aboobaker AA, Blaxter M**. 2016. No evidence for extensive horizontal gene transfer in the  
451 genome of the tardigrade *Hypsibius dujardini*. Proceedings of the National Academy of Sciences  
452 **113**:5053–5058. doi:<http://doi.org/10.1073/pnas.1600338113>.
- 453 29. **Bemm F, Weiß CL, Schultz J, Förster F**. 2016. Genome of a tardigrade: Horizontal  
454 gene transfer or bacterial contamination? Proceedings of the National Academy of Sciences  
455 **113**:E3054–E3056. doi:<http://doi.org/10.1073/pnas.1525116113>.
- 456 30. **Arakawa K**. 2016. No evidence for extensive horizontal gene transfer from the draft genome  
457 of a tardigrade. Proceedings of the National Academy of Sciences **113**:E3057–E3057. doi:<http://doi.org/10.1073/pnas.1602711113>.
- 459 31. **Delmont TO, Eren AM**. 2016. Identifying contamination with advanced visualization and  
460 analysis practices: Metagenomic approaches for eukaryotic genome assemblies. doi:<http://doi.org/10.7287/peerj.preprints.1695v1>.
- 462 32. **Bik EM, Casadevall A, Fang FC**. 2016. The prevalence of inappropriate image duplication in  
463 biomedical research publications. bioRxiv 049452. doi:<http://doi.org/10.1101/049452>.
- 464 33. **Bik EM, Casadevall A, Fang FC**. 2016. The prevalence of inappropriate image duplication in  
465 biomedical research publications. mBio **7**:e00809–16. doi:<http://doi.org/10.1128/mbio.00809-16>.
- 466 34. **Wolfe-Simon F, Blum JS, Kulp TR, Gordon GW, Hoefft SE, Pett-Ridge J, Stolz JF, Webb**  
467 **SM, Weber PK, Davies PCW, Anbar AD, Oremland RS**. 2010. A bacterium that can grow by  
468 using arsenic instead of phosphorus. Science **332**:1163–1166. doi:<http://doi.org/10.1126/science.1197258>.
- 470 35. How is the Altmetric Attention Score calculated? [https://help.altmetric.com/support/solutions/](https://help.altmetric.com/support/solutions/articles/6000060969-how-is-the-altmetric-attention-score-calculated-)  
471 [articles/6000060969-how-is-the-altmetric-attention-score-calculated-](https://help.altmetric.com/support/solutions/articles/6000060969-how-is-the-altmetric-attention-score-calculated-).
- 472 36. **Schloss PD, Westcott SL, Jenior ML, Highlander SK**. 2015. Sequencing 16S rRNA gene

- 473 fragments using the PacBio SMRT DNA sequencing system. doi:[http://doi.org/10.7287/peerj.](http://doi.org/10.7287/peerj.preprints.778v1)  
474 [preprints.778v1](http://doi.org/10.7287/peerj.preprints.778v1).
- 475 37. **Schloss PD, Jenior ML, Koumpouras CC, Westcott SL, Highlander SK.** 2016. Sequencing  
476 16S rRNA gene fragments using the PacBio SMRT DNA sequencing system. doi:[http://doi.org/10.](http://doi.org/10.7287/peerj.preprints.778v2)  
477 [7287/peerj.preprints.778v2](http://doi.org/10.7287/peerj.preprints.778v2).
- 478 38. **Schloss PD, Jenior ML, Koumpouras CC, Westcott SL, Highlander SK.** 2016. Sequencing  
479 16S rRNA gene fragments using the PacBio SMRT DNA sequencing system. PeerJ 4:e1869.  
480 doi:<http://doi.org/10.7717/peerj.1869>.
- 481 39. **Baxter NT, Koumpouras CC, Rogers MA, Ruffin MT, Schloss P.** 2016. DNA from fecal  
482 immunochemical test can replace stool for microbiota-based colorectal cancer screening. bioRxiv  
483 048389. doi:<http://doi.org/10.1101/048389>.
- 484 40. **Baxter NT, Koumpouras CC, Rogers MAM, Ruffin MT, Schloss PD.** 2016. DNA from fecal  
485 immunochemical test can replace stool for detection of colonic lesions using a microbiota-based  
486 model. Microbiome 4. doi:<http://doi.org/10.1186/s40168-016-0205-y>.
- 487 41. **Imperiale MJ, Shenk T, Bertuzzi S.** 2016. mSphereDirect: Author-initiated peer review of  
488 manuscripts. mSphere 1:e00307–16. doi:<http://doi.org/10.1128/msphere.00307-16>.
- 489 42. **Vence T.** 2017. Journals seek out preprints. TheScientist.
- 490 43. **Barsh GS, Bergman CM, Brown CD, Singh ND, Copenhaver GP.** 2016. Bringing PLOS  
491 genetics editors to preprint servers. PLOS Genetics 12:e1006448. doi:[http://doi.org/10.1371/](http://doi.org/10.1371/journal.pgen.1006448)  
492 [journal.pgen.1006448](http://doi.org/10.1371/journal.pgen.1006448).
